# Supplementary material
Source: PubMed Central journal article supplement (PMC2866159)
Supplement: NIHMS188657-supplement-1_si_001.pdf [file NIHMS188657-supplement-1_si_001.pdf]

## Supporting Information

### An Automated High-Throughput System to Fractionate Plant Natural Products for Drug Discovery

Ying Tu,<sup>†</sup> Cynthia Jeffries,<sup>†</sup> Hong Ruan,<sup>†</sup> Cynthia Nelson,<sup>†</sup> David Smithson,<sup>†</sup> Anang A.  
Shelat,<sup>†</sup> Xing-Cong Li,<sup>‡</sup> John P. Hester,<sup>‡</sup> Troy Smillie,<sup>‡</sup> Ikhlas A. Khan,<sup>‡</sup>  
Larry Walker,<sup>‡</sup> Kip Guy,<sup>\*,†</sup> and Bing Yan<sup>\*,†</sup>

**Figure S1.** Typical ELSD chromatograms for preparative HPLC fractionation.

**Figure S2.** Chromatograms for sample 79622 showing the correlation of the ELSD signal to the molecular mass of fractions.

**Figure S3.** Biological screening of fractions from the natural products library.

**Table S1.** Sample Registration Information for Batch 05112009\_1.

**Figure S1.** Typical ELSD chromatograms for preparative HPLC fractionation:

(A) Sample 78794 with predominantly polar compounds; (B) sample 78862 with predominantly nonpolar compounds, and (C) sample 79065 with both polar and nonpolar compounds.

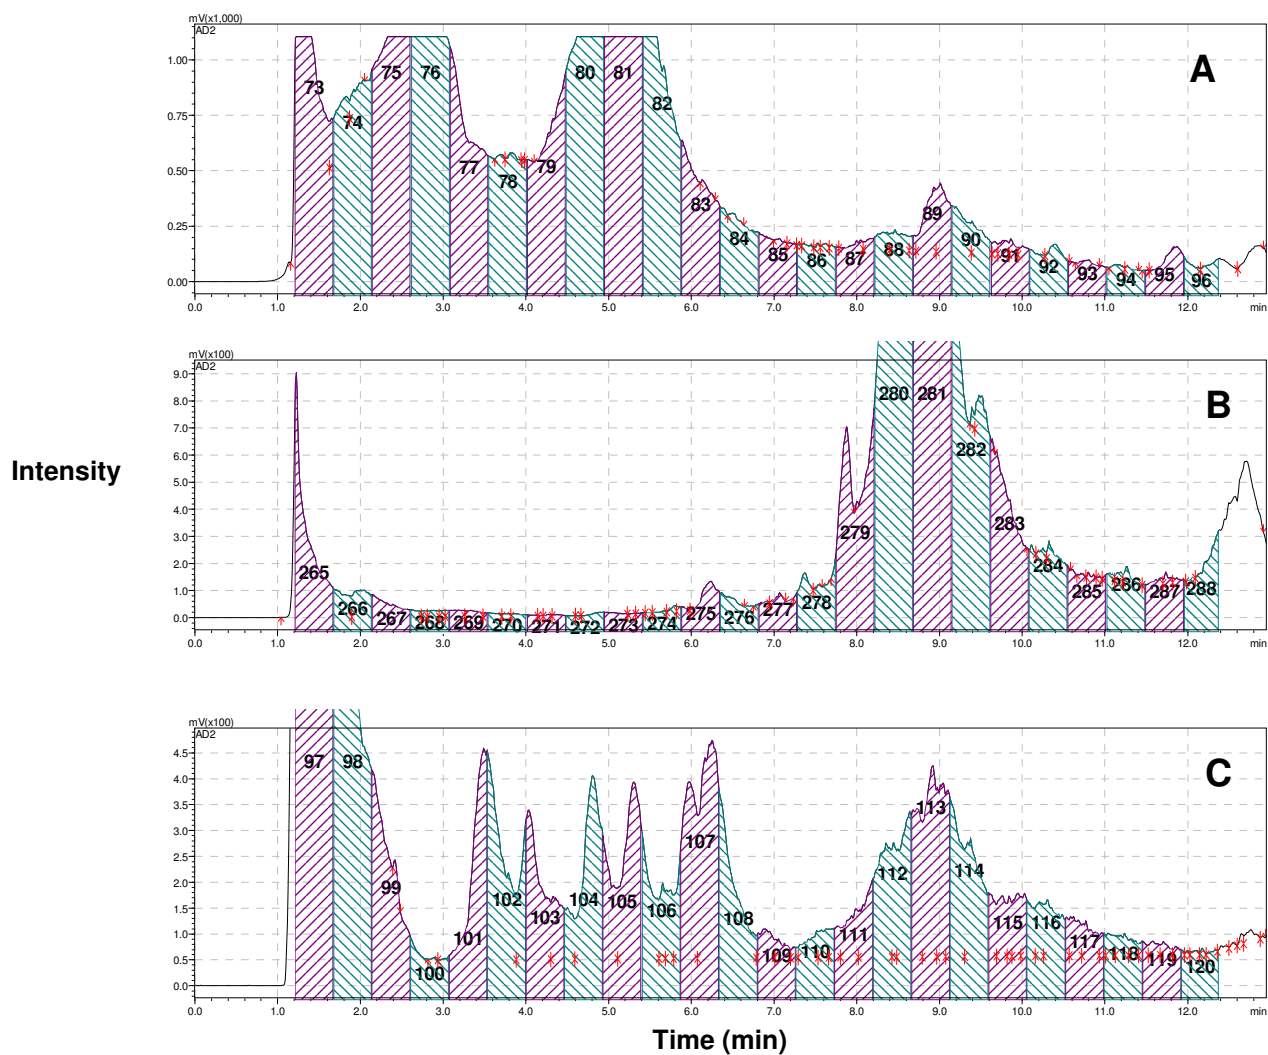

**Figure S2.** Chromatograms for sample 79622 showing the correlation of the ELSD signal to the molecular mass of fractions. (A) UV chromatogram at 254 nm; (B) molecular mass of fractions in milligrams, and (C) ELSD chromatogram.

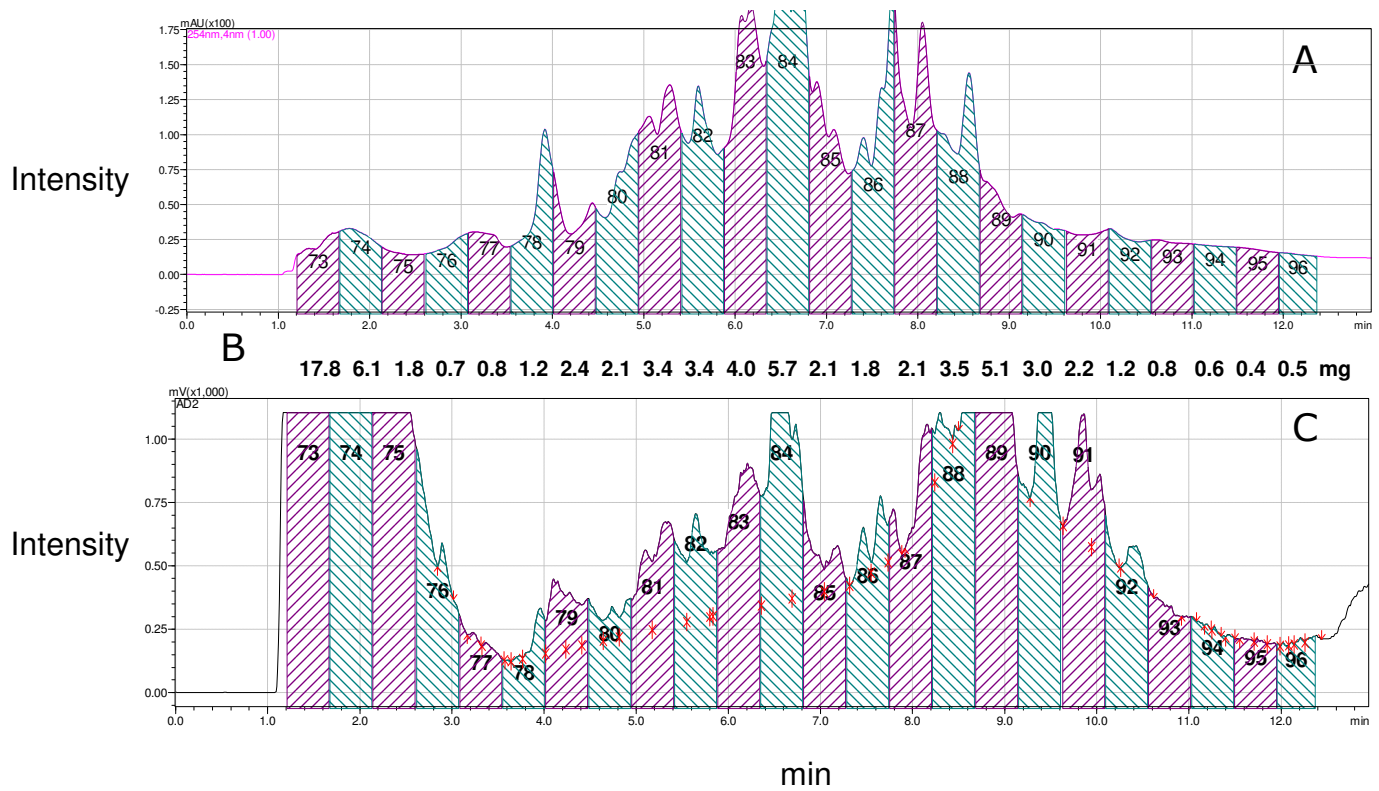

**Figure S3.** Biological screening of fractions from the plant extracts library by a panel of five assays results of 140 randomly chosen samples. EC<sub>50</sub> values (μg/mL) represent results of three independent experiments. Fractions are grouped by extract on the y-axis, with more polar fractions at the top of each extract group.

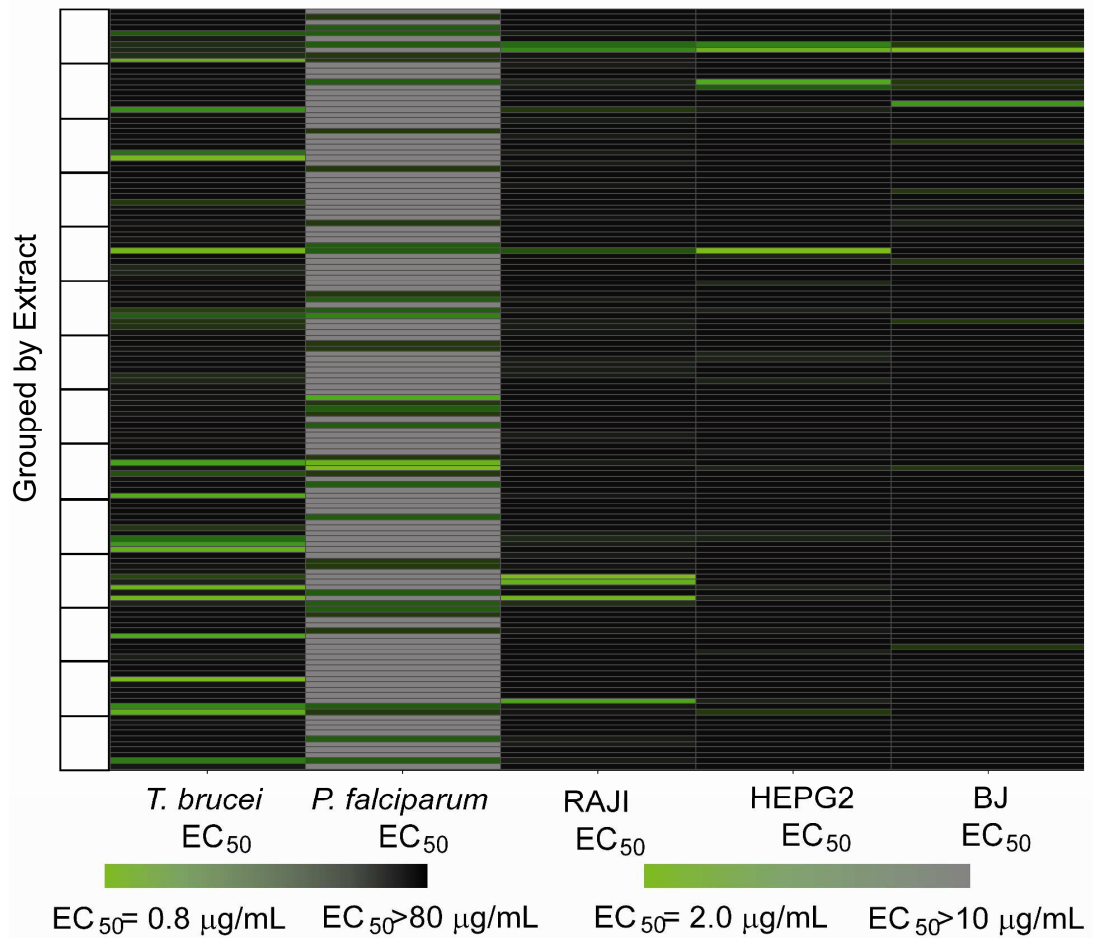

**Table S1.** Sample Registration Information for Batch 05112009\_1<sup>a</sup>

| No. | NP number | Plant Part | Mass(mg) | Family          | Species                                     |
|-----|-----------|------------|----------|-----------------|---------------------------------------------|
| 1   | 79547     | FL-FR      | 100.50   | Rubiaceae       | <i>Psychotria berteriana</i> DC.            |
| 2   | 79548     | ST         | 102.80   | Myrtaceae       | <i>Myrcia splendens</i> DC.                 |
| 3   | 79549     | PL         | 105.00   | Selaginellaceae | <i>Selaginella krugii</i> Hieron.           |
| 4   | 79550     | LF         | 108.60   | Betulaceae      | <i>Alnus serrulata</i> Willd.               |
| 5   | 79551     | PX         | 102.30   | Lamiaceae       | <i>Hyptis mutabilis</i> Briq.               |
| 6   | 79552     | FR         | 106.20   | Polygonaceae    | <i>Coccoloba uvifera</i> L.                 |
| 7   | 79553     | lf-fl-fr   | 106.40   | Asteraceae      | <i>Sonchus oleraceus</i> L.                 |
| 8   | 79554     | BK         | 116.50   | Bignoniaceae    | <i>Tabebuia heterophylla</i> Britton        |
| 9   | 79555     | FR         | 104.70   | Meliaceae       | <i>Guarea guidonia</i> (L.) Sleumer         |
| 10  | 79556     | LF         | 103.40   | Zingiberaceae   | <i>Renealmia alpinia</i> (Rottb.) Maas      |
| 11  | 79557     | PL         | 101.50   | Haemodoraceae   | <i>Lachnanthes caroliniana</i> (Lam.) Dandy |
| 12  | 79558     | LF-FL      | 113.30   | Cucurbitaceae   | <i>Cucurbita moschata</i> Duchesne          |

<sup>a</sup>Abbreviations: NP, natural product; FL-FR, leaf & flower; ST, stem; LF, leaf; PX, plant minus roots; FR, fruit; LF-FL-FR, leaf,

flower & fruit; BK, bark; LF-FL, leaf & flower.
